# Supplementary material
Source: Research Square preprint supplement (doi:10.21203/rs.3.rs-9153635/v1)
Supplement: Supplementary file 1 [file 28af7aa30b9619d76eb55c54.docx]

Supplementary Figure 1. Cohort Diagram


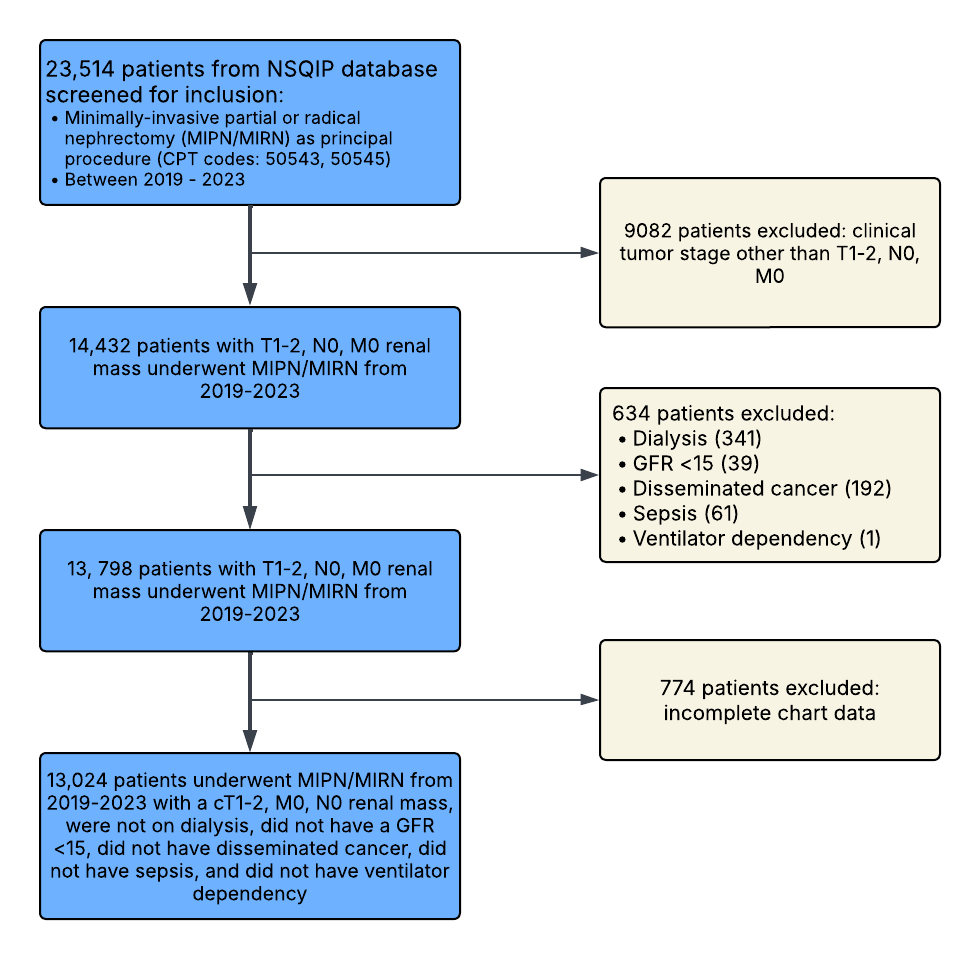


Cohort diagram of inclusion and exclusion criteria.

Supplementary Table 1. Multivariate Analysis of Association Between Individual Tumor Stage and Outcomes

| 30-Day Post-Operative Complications | Reference: cT1a | cT1b  OR (95% CI) | cT2a  OR (95% CI) | cT2b  OR (95% CI) |
| --- | --- | --- | --- | --- |
| Transfusion <72hr | - | 1.63 (1.15-2.31)* | 1.62 (0.87-2.85) | 1.36 (0.45-3.33) |
| Delayed Discharge ≥3d | - | 1.15 (1.00-1.32)* | 1.06 (0.82-1.36) | 1.34 (0.88-2.01) |

AKI: Acute Kidney Injury

Parentheses indicate percentages for categorical variables and ± for standard deviations for continuous variables. *indicates statistical significance. - indicates relationship did not achieve statistical significance (p<0.10) in univariate testing.

Adjusted odds ratios and 95% confidence intervals of transfusion in multivariate logistic regression modeling of various 30-day post-operative complications for patients undergoing minimally-invasive nephrectomy in NSQIP.

Supplementary Table 2. Multivariate Analysis of Cardiorenal Outcomes in 4088 Patients with CKD Stage IIb-III

| 30-Day Post-Operative Complications | MIRN (vs MIPN)  OR (95% CI) | cT1b-T2 (vs cT1a)  OR (95% CI) | Pre-Operative eGFR (+10)  OR (95% CI) |
| --- | --- | --- | --- |
| Post-operative Dialysis | - | - | 0.77 (0.51-1.18) |
| Post-operative AKI | 1.71 (1.15-2.54) | 1.30 (0.88-1.92) | 0.84 (0.71-0.98)* |
| Death | 2.02 (0.72-5.84)* | - | 0.70 (0.45-1.10) |
| CVA with Neurologic Deficit | - | - | 0.62 (0.33-1.16) |
| Cardiac Arrest | - | - | 0.73 (0.42-1.26) |
| Myocardial Infarction | - | 1.74 (0.74-4.28) | - |
| MACE | 1.88 (0.94-3.81) | 1.09 (0.55-2.17) | 0.82 (0.62-1.09) |

CKD: Chronic Kidney Disease; MIRN: Minimally-Invasive Radical Nephrectomy; MIPN: Minimally-Invasive Partial Nephrectomy; AKI: Acute Kidney Injury; CVA: Cerebrovascular Accident; MACE: Major Adverse Cardiac Event

Parentheses indicate percentages for categorical variables and ± for standard deviations for continuous variables. *indicates statistical significance. - indicates relationship did not achieve statistical significance (p<0.10) in univariate testing.

Adjusted odds ratios and 95% confidence intervals of cardiorenal outcomes in multivariate logistic regression modeling of various 30-day post-operative complications for patients undergoing minimally-invasive nephrectomy in NSQIP.

Supplementary Table 3. Univariate Analysis of Surgical Approach and Outcomes

| 30-Day Post-Operative Complications | MIRN (vs MIPN)  OR (95% CI) |
| --- | --- |
| Surgical | |
| Transfusion <72 hours | 1.17 (0.94-1.45) |
| Wound Dehiscence | 7.43 (3.53-17.24)* |
| Lymphatic Leak | 0.61 (0.46-0.79)* |
| (Clinically Significant) | 0.49 (0.29-0.79)* |
| Urinary Leak/Fistula | 0.18 (0.07-0.39)* |
| Stent Placement | 0.43 (0.30-0.61)* |
| Ileus | 2.18 (1.60-2.96)* |
| Prolonged Operation Time ≥5hr | 0.73 (0.63-0.85)* |
| Delayed Discharge ≥3d | 1.69 (1.57-1.81)* |
| Unplanned Related Reoperation | 1.12 (0.82-1.51) |
| Clinical | |
| Post-operative Dialysis | 1.60 (0.83-2.97) |
| Post-operative AKI | 2.88 (2.38-3.50)* |
| CVA with Neurologic Deficit | 1.90 (0.86-4.06) |
| Cardiac Arrest | 1.66 (0.73-3.64) |
| Myocardial Infarction | 1.85 (1.09-3.11)* |
| Major Adverse Cardiac Event | 2.01 (1.39-2.89)* |
| Unplanned Related Readmission | 0.91 (0.76-1.08) |
| Death | 2.62 (1.36-5.02)* |

AKI: Acute Kidney Injury; CVA: Cerebral Vascular Accident

Parentheses indicate percentages for categorical variables and ± for standard deviations for continuous variables. *indicates statistical significance. - indicates relationship did not achieve statistical significance (p<0.10) in univariate testing.

Odds ratios and 95% confidence intervals in univariate logistic regression modeling of various 30-day post-operative complications for patients undergoing MIRN and MIPN in NSQIP.

Supplementary Table 4. Univariate Analysis of Association Between Tumor Stage and Outcomes

| 30-Day Post-Operative Complications | cT1b-T2 (95% CI) |
| --- | --- |
| Surgical | |
| Transfusion <72 hours | 1.77 (1.45-2.16)* |
| Wound Dehiscence | 2.44 (1.23-4.97)* |
| Lymphatic Leak | 1.05 (0.84-1.31) |
| (Clinically Significant) | 1.40 (0.96-2.02) |
| Urinary Leak/Fistula | 0.78 (0.49-1.23) |
| Stent Placement | 0.89 (0.68-1.16) |
| Ileus | 1.13 (0.82-1.55) |
| Prolonged Operation Time ≥5hr | 1.31 (1.15-1.48)* |
| Delayed Discharge ≥3d | 1.57 (1.47-1.69)* |
| Unplanned Related Reoperation | 1.08 (0.80-1.43) |
| Clinical | |
| Post-operative Dialysis | 2.31 (1.25-4.33)* |
| Post-operative AKI | 2.13 (1.76-2.59)* |
| CVA with Neurologic Deficit | 0.50 (0.18-1.18) |
| Cardiac Arrest | 2.35 (1.08-5.24)* |
| Myocardial Infarction | 1.62 (0.96-2.72) |
| Major Adverse Cardiac Event | 1.44 (0.99-2.07) |
| Unplanned Related Readmission | 1.18 (1.00-1.38)* |
| Death | 2.19 (1.15-4.24)* |

AKI: Acute Kidney Injury; CVA: Cerebral Vascular Accident

Parentheses indicate percentages for categorical variables and ± for standard deviations for continuous variables. *indicates statistical significance. - indicates relationship did not achieve statistical significance (p<0.10) in univariate testing.

Odds ratios and 95% confidence intervals in univariate logistic regression modeling of various 30-day post-operative complications for patients undergoing minimally-invasive nephrectomy in NSQIP.

Supplementary Table 5. Univariate Analysis of Surgical Outcomes 1 of 2

|  | Transfusion <72 Hours | Wound Dehiscence | Prolonged Operating Time | Stent Placement |
| --- | --- | --- | --- | --- |
| Sex (male) | 0.89 (0.72-1.09) | 1.31 (0.64-2.89) | 1.49 (1.30-1.71)* | 0.96 (0.74-1.25) |
| 5-mFI (+1 pt) | 1.52 (1.35-1.71)* | 1.39 (0.91-2.08) | 1.19 (1.10-1.28)* | 1.06 (0.90-1.24) |
| ASA Score (Low) | 0.68 (0.55-0.85)* | 0.25 (0.08-0.64)* | 0.62 (0.53-0.71)* | 1.07 (0.82-1.38) |
| Tobacco Use (Yes) | 0.87 (0.65-1.15) | 1.45 (0.58-3.15) | 0.80 (0.66-0.95)* | 0.87 (0.60-1.23) |
| Pre-operative UTI | - | - | - | 5.30 (0.54-21.38) |
| Bleeding Disorder | 2.87 (1.78-4.39)* | 4.65 (1.06-13.40)* | 0.64 (0.36-1.05) | 0.85 (0.27-1.96) |
| Immunosuppressive Therapy | 1.43 (0.89-2.18) | 2.38 (0.54-6.83) | 1.00 (0.72-1.36) | 1.04 (0.51-1.87) |
| Drains | 1.69 (1.39-2.07)* | 0.22 (0.07-0.56)* | 2.34 (2.06-2.65)* | 2.66 (2.06-3.47)* |
| Prior Pelvic Radiation (Yes) | 1.36 (0.52-2.88) | - | 1.56 (0.91-2.49) | 1.64 (0.52-3.82) |
| Prior Pelvic Surgery (Yes) | 0.96 (0.77-1.19) | 0.72 (0.31-1.51) | 0.98 (0.86-1.14) | 1.13 (0.87-1.47) |
| Age (+5 yr) | 1.02 (1.01-1.03)* | 1.03 (1.00-1.07)* | 0.99 (0.99-1.00) | 1.00 (0.99-1.01) |
| BMI (+1 kg/m2) | 0.99 (0.97-1.00) | 1.08 (1.04-1.12)* | 1.03 (1.03-1.04)* | 1.00 (0.99-1.02) |
| Year of Surgery (+1 year) | 0.95 (0.89-1.02) | 1.03 (0.81-1.31) | 1.03 (0.98-1.07) | 0.89 (0.81-0.97)* |
| eGFR (+10 mL/min/1.73 m²) | 0.99 (0.98-0.99)* | 0.99 (0.97-1.00) | 0.99 (0.99-0.99)* | 1.00 (0.99-1.00) |
| WBC (+1 K/μL) | 0.97 (0.92-1.01) | 1.11 (1.00-1.18)* | 1.01 (0.98-1.03) | 1.05 (1.00-1.09)* |
| HCT (+1%) | 0.85 (0.83-0.87)* | 1.00 (0.93-1.08) | 1.01 (0.99-1.03) | 0.99 (0.96-1.01) |
| Platelets (+10 K/μL) | 1.00 (0.99-1.00) | 0.99 (0.99-1.00) | 1.00 (0.99-1.00) | 0.99 (0.99-1.00) |
| PTT (+1 sec) | 1.02 (0.9-1.04) | 1.05 (0.98-1.09) | 0.98 (0.97-0.99)* | 1.01 (0.98-1.04) |
| INR (+0.1) | 1.30 (1.04-1.53)* | 0.99 (0.02-1.76) | 0.61 (0.30-1.01) | 0.43 (0.07-1.24) |
| Prolonged Operating Time | 1.01 (1.01-1.01)* | 0.99 (0.99-1.00) | - | 1.01 (1.01-1.01)* |

Ref: reference; 5-mFI: Modified 5 Item Frailty Index, ASA: American Society of Anesthesiologists, UTI: Urinary Tract Infection, BMI: Body Mass Index, eGFR: estimated Glomerular Filtration Rate, WBC: White Blood Cell, HCT: Hematocrit, PTT: Partial Thromboplastin Time, INR: International Normalized Ratio.

Parentheses indicate percentages for categorical variables and ± for standard deviations for continuous variables. *indicates statistical significance. - indicates relationship did not achieve statistical significance (p<0.10) in univariate testing.

Description of covariates in univariate modeling of 30-day post-operative surgical outcomes for patients undergoing nephrectomy in NSQIP (1 of 2).

Supplementary Table 6. Univariate Analysis of Surgical Outcomes 2 of 2

|  | Urinary Fistula | Ileus | Lymph Leak | Clinically Significant Lymph Leak | Unplanned Related Reoperation |
| --- | --- | --- | --- | --- | --- |
| Sex (male) | 0.95 (0.62-1.48) | 1.40 (1.01-1.98)* | 1.08 (0.87-1.36) | 1.39 (0.94-2.10) | 1.73 (1.26-2.41)* |
| 5-mFI (+1 pt) | 1.30 (1.00-1.67)* | 1.39 (1.15-1.66)* | 1.28 (1.12-1.46)* | 1.53 (1.23-1.89)* | 1.26 (1.06-1.50)* |
| ASA Score (Low) | 1.03 (0.66-1.58) | 0.51 (0.35-0.73)* | 0.74 (0.58-0.93)* | 0.62 (0.41-0.93)* | 0.61 (0.44-0.83)* |
| Tobacco Use (Yes) | 2.02 (1.24-3.19)* | 1.07 (0.70-1.58) | 0.81 (0.58-1.10) | 1.36 (0.85-2.10) | 1.81 (1.30-2.48)* |
| Pre-operative UTI | 33.77 (7.47-103.83)* | - | 3.87 (0.40-15.56) | - | 14.35 (33.20-43.54)* |
| Bleeding Disorder | 0.81 (0.08-3.02) | 2.19 (0.93-4.34) | 2.66 (1.56-4.25)* | 2.51 (0.95-5.36) | 1.43 (0.55-3.03) |
| Immunosuppressive Therapy | 2.74 (1.25-5.26)* | 2.62 (1.49-4.29)* | 1.70 (1.06-2.59)* | 0.94 (0.30-2.21) | 2.82 (1.71-4.39)* |
| Drains | 4.60 (2.87-7.69)* | 0.87 (0.63-1.18) | 2.03 (1.64-2.53)* | 1.82 (1.26-2.63)* | 1.33 (1.01-1.76)* |
| Prior Pelvic Radiation (Yes) | 3.17 (0.74-8.75) | 1.62 (0.38-4.41) | 1.19 (0.38-2.77) | 1.15 (0.12-4.28) | - |
| Prior Pelvic Surgery (Yes) | 0.73 (0.44-1.15) | 1.38 (1.00-1.87)* | 1.08 (0.86-1.35) | 0.66 (0.42-0.99)* | 0.73 (0.53-0.99)* |
| Age (+5 yr) | 0.98 (0.97-1.00) | 1.03 (1.01-1.04)* | 1.00 (0.99-1.01) | 1.00 (0.99-1.02) | 1.01 (1.00-1.02)* |
| BMI (+1 kg/m2) | 1.03 (0.99-1.05) | 1.02 (0.99-1.04) | 0.99 (0.98-1.01) | 1.01 (0.98-1.03) | 1.02 (0.99-1.04) |
| Year of Surgery (+1 year) | 0.88 (0.76-1.02) | 0.89 (0.80-0.99)* | 1.14 (1.06-1.23)* | 1.09 (0.96-1.24) | 0.94 (0.85-1.04) |
| eGFR (+10 mL/min/1.73 m²) | 1.00 (0.99-1.01) | 0.98 (0.97-0.99)* | 1.00 (0.99-1.00) | 1.00 (0.99-1.01) | 1.00 (0.99-1.00) |
| WBC (+1 K/μL) | 1.03 (0.94-1.10) | 1.10 (1.05-1.14)* | 0.99 (0.95-1.04) | 1.04 (0.96-1.10) | 1.00 (0.94-1.06) |
| HCT (+1%) | 0.96 (0.92-1.01) | 0.96 (0.93-0.99)* | 0.96 (0.94-0.98)* | 0.94 (0.90-0.98)* | 0.99 (0.97-1.03) |
| Platelets (+10 K/μL) | 0.99 (0.99-1.00) | 1.00 (0.99-1.00) | 0.99 (0.99-1.00) | 0.99 (0.99-1.00) | 1.00 (0.99-1.00) |
| PTT (+1 sec) | 1.04 (0.99-1.08) | 0.99 (0.96-1.03) | 1.05 (1.03-1.07)* | 1.06 (1.02-1.09)* | 1.03 (1.00-1.06)* |
| INR (+0.1) | 0.29 (0.01-1.46) | 1.20 (0.68-1.54) | 1.17 (0.78-1.46) | 1.17 (0.43-1.60) | 1.21 (0.70-1.54) |
| Prolonged Operating Time | 1.01 (1.00-1.01)* | 1.00 (1.00-1.01)* | 1.00 (1.00-1.00)* | 1.00 (1.00-1.01)* | 1.00 (1.00-1.01)* |

Ref: reference; 5-mFI: Modified 5 Item Frailty Index, ASA: American Society of Anesthesiologists, UTI: Urinary Tract Infection, BMI: Body Mass Index, eGFR: estimated Glomerular Filtration Rate, WBC: White Blood Cell, HCT: Hematocrit, PTT: Partial Thromboplastin Time, INR: International Normalized Ratio.

Parentheses indicate percentages for categorical variables and ± for standard deviations for continuous variables. *indicates statistical significance. - indicates relationship did not achieve statistical significance (p<0.10) in univariate testing.

Description of covariates in univariate modeling of 30-day post-operative surgical outcomes for patients undergoing nephrectomy in NSQIP (2 of 2).

Supplementary Table 7. Univariate Analysis of Renal and Additional Clinical Outcomes

|  | Post-operative Dialysis | AKI | Delayed Discharge ≥3d | Unplanned Related Readmission | Death |
| --- | --- | --- | --- | --- | --- |
| Sex (male) | 1.09 (0.58-2.13) | 1.37 (1.11-1.70)* | 0.88 (0.82-0.95)* | 1.41 (1.19-1.68)* | 1.91 (0.93-4.38) |
| 5-mFI (+1 pt) | 2.23 (1.57-3.13)* | 1.63 (1.45-1.83)* | 1.26 (1.21-1.31)* | 1.22 (1.10-1.34)* | 1.87 (1.28-2.69)* |
| ASA Score (Low) | 0.13 (0.03-0.35)* | 0.48 (0.38-0.60)* | 0.67 (0.63-0.72)* | 0.74 (0.63-0.88)* | 0.41 (0.16-0.87)* |
| Tobacco Use (Yes) | 1.36 (0.60-2.76) | 0.75 (0.55-0.99)* | 1.05 (0.96-1.15) | 1.01 (0.81-1.24) | 1.56 (0.68-3.22) |
| Pre-operative UTI | - | - | 2.19 (0.88-5.15) | 13.76 (5.24-33.00)* | - |
| Bleeding Disorder | 1.74 (0.18-6.66) | 1.60 (0.89-2.64) | 2.01 (1.63-2.49)* | 2.04 (1.32-3.01)* | 4.01 (0.93-11.61) |
| Immunosuppressive Therapy | 5.23 (2.13-11.10)* | 0.82 (0.46-1.35) | 1.18 (0.99-1.39) | 1.26 (0.85-1.79) | 2.08 (0.48-5.92) |
| Drains | 1.21 (0.65-2.24) | 0.74 (0.60-0.91)* | 1.70 (1.59-1.82)* | 1.29 (1.10-1.51)* | 0.66 (0.32-1.30) |
| Prior Pelvic Radiation (Yes) | 3.33 (0.34-12.83) | 2.68 (1.37-4.72)* | 1.24 (0.90-1.68) | 1.23 (0.57-2.31) | - |
| Prior Pelvic Surgery (Yes) | 2.52 (1.36-4.71)* | 1.04 (0.85-1.27) | 0.98 (0.91-1.05) | 0.83 (0.70-0.99)* | 1.08 (0.53-2.10) |
| Age (+5 yr) | 1.07 (1.04-1.10)* | 1.03 (1.02-1.03)* | 1.02 (1.02-1.02)* | 1.01 (1.00-1.02)* | 1.12 (1.08-1.17)* |
| BMI (+1 kg/m2) | 1.08 (1.04-1.11)* | 1.01 (0.99-1.02) | 1.00 (0.99-1.01) | 0.99 (0.98-1.01) | 0.98 (0.94-1.03) |
| Year of Surgery (+1 year) | 1.03 (0.83-1.27) | 1.58 (1.47-1.71)* | 0.91 (0.89-0.94)* | 0.96 (0.91-1.01) | 0.72 (0.57-0.91)* |
| eGFR (+10 mL/min/1.73 m²) | 0.94 (0.92-0.95)* | 0.98 (0.97-0.98)* | 0.99 (0.99-0.99)* | 0.99 (0.99-0.99) | 0.96 (0.95-0.98)* |
| WBC (+1 K/μL) | 1.02 (0.89-1.13) | 0.97 (0.92-1.01) | 1.01 (0.99-1.03) | 1.04 (1.00-1.07)* | 1.02 (0.88-1.13) |
| HCT (+1%) | 0.87 (0.83-0.92)* | 0.93 (0.91-0.95)* | 0.96 (0.95-0.96)* | 0.98 (0.97-1.00) | 0.89 (0.84-0.95)* |
| Platelets (+10 K/μL) | 1.00 (0.99-1.00) | 0.99 (0.99-0.99)* | 0.99 (0.99-0.99)* | 1.00 (0.99-1.00) | 1.00 (0.99-1.01) |
| PTT (+1 sec) | 0.95 (0.90-1.01) | 1.00 (0.97-1.02) | 1.00 (0.99-1.01) | 1.01 (0.99-1.03) | 1.06 (0.99-1.10) |
| INR (+0.1) | 1.32 (0.58-1.75) | 1.16 (0.80-1.44) | 1.36 (1.17-1.64)* | 1.17 (0.90-1.40) | 1.33 (0.32-1.88) |
| Prolonged Operating Time | 1.01 (1.00-1.01)* | 1.00 (0.99-1.00) | 1.00 (1.00-1.00)* | 1.00 (1.00-1.00)* | 1.00 (0.99-1.00) |

Ref: reference; 5-mFI: Modified 5 Item Frailty Index, ASA: American Society of Anesthesiologists, UTI: Urinary Tract Infection, BMI: Body Mass Index, eGFR: estimated Glomerular Filtration Rate, WBC: White Blood Cell, HCT: Hematocrit, PTT: Partial Thromboplastin Time, INR: International Normalized Ratio.

Parentheses indicate percentages for categorical variables and ± for standard deviations for continuous variables. *indicates statistical significance. - indicates relationship did not achieve statistical significance (p<0.10) in univariate testing.

Description of covariates in univariate modeling of additional 30-day post-operative renal and additional clinical outcomes for patients undergoing nephrectomy in NSQIP.

Supplementary Table 8. Univariate Analysis of Cardiac and Neurologic Clinical Outcomes

|  | CVA with Neurologic Deficit | Cardiac Arrest | Myocardial Infarction | Major Adverse Cardiac Events |
| --- | --- | --- | --- | --- |
| Sex (male) | 0.64 (0.30-1.37) | 1.49 (0.65-3.80) | 1.39 (0.80-2.50) | 1.07 (0.73-1.57) |
| 5-mFI (+1 pt) | 1.55 (0.99-2.41) | 1.84 (1.16-2.85)* | 1.52 (1.12-2.06)* | 1.71 (1.38-2.11)* |
| ASA Score (Low) | 0.79 (0.33-1.72) | 0.49 (0.17-1.16) | 0.55 (0.29-0.97)* | 0.57 (0.37-0.86)* |
| Tobacco Use (Yes) | 0.97 (0.30-2.49) | 1.04 (0.32-2.68) | 1.26 (0.63-2.33) | 1.15 (0.70-1.80) |
| Pre-operative UTI | - | - | - | - |
| Bleeding Disorder | 9.19 (2.79-23.59)* | 6.10 (1.38-18.02)* | 2.50 (0.58-6.95) | 5.31 (2.70-9.45)* |
| Immunosuppressive Therapy | 1.38 (0.14-5.44) | - | 1.97 (0.62-4.72) | 1.60 (0.68-3.19) |
| Drains | 1.08 (0.49-2.32) | 1.19 (0.53-2.60) | 0.95 (0.56-1.61) | 0.84 (0.57-1.22) |
| Prior Pelvic Radiation (Yes) | 5.18 (0.53-20.50) | - | 2.33 (0.24-8.85) | 2.31 (0.54-6.32) |
| Prior Pelvic Surgery (Yes) | 2.27 (1.06-4.91)* | 2.04 (0.93-4.49) | 0.95 (0.53-1.62) | 1.22 (0.83-1.76) |
| Age (+5 yr) | 1.03 (0.99-1.06) | 1.09 (1.05-1.14)* | 1.08 (1.05-1.11)* | 1.07 (1.05-1.09)* |
| BMI (+1 kg/m2) | 1.02 (0.97-1.07) | 1.02 (0.97-1.07) | 1.01 (0.97-1.04) | 1.01 (0.98-1.03) |
| Year of Surgery (+1 year) | 0.87 (0.67-1.14) | 0.80 (0.60-1.05) | 0.98 (0.82-1.17) | 0.90 (0.80-1.03) |
| eGFR (+10 mL/min/1.73 m²) | 0.98 (0.97-1.00) | 0.96 (0.94-0.98)* | 0.98 (0.97-0.99)* | 0.98 (0.97-0.98)* |
| WBC (+1 K/μL) | 1.09 (0.97-1.18) | 1.09 (0.96-1.18) | 1.07 (0.97-1.14) | 1.07 (1.00-1.12)* |
| HCT (+1%) | 0.99 (0.92-1.09) | 0.86 (0.81-0.92)* | 0.96 (0.91-1.02) | 0.93 (0.90-0.97)* |
| Platelets (+10 K/μL) | 1.00 (0.99-1.01) | 1.00 (0.99-1.01) | 0.99 (0.99-1.00) | 1.00 (0.99-1.00) |
| PTT (+1 sec) | 1.00 (0.92-1.08) | 1.04 (0.95-1.10) | 1.02 (0.96-1.06) | 1.03 (0.99-1.06) |
| INR (+0.1) | 1.46 (0.73-1.91) | 1.41 (0.50-1.93) | 1.04 (0.15-1.60) | 1.32 (0.86-1.64) |
| Prolonged Operating Time | 1.00 (0.99-1.01) | 1.01 (1.00-1.01)* | 0.99 (0.99-1.00) | 1.00 (0.99-1.00) |

Ref: reference; 5-mFI: Modified 5 Item Frailty Index, ASA: American Society of Anesthesiologists, UTI: Urinary Tract Infection, BMI: Body Mass Index, eGFR: estimated Glomerular Filtration Rate, WBC: White Blood Cell, HCT: Hematocrit, PTT: Partial Thromboplastin Time, INR: International Normalized Ratio.

Parentheses indicate percentages for categorical variables and ± for standard deviations for continuous variables. *indicates statistical significance. - indicates relationship did not achieve statistical significance (p<0.10) in univariate testing.

Description of covariates in univariate modeling of additional 30-day post-operative cardiac and neurologic clinical outcomes for patients undergoing nephrectomy in NSQIP.

Supplementary Table 9. Multivariate Analysis of Surgical Outcomes 1 of 2

|  | Transfusion <72 Hours | Wound Dehiscence | Prolonged Operating Time | Stent Placement |
| --- | --- | --- | --- | --- |
| Type (radical) | - | 5.25 (1.86-16.68)* | 0.94 (0.68-1.28) | 0.68 (0.42-1.05) |
| cT1a tumor stage (Yes) | 1.61 (1.16–2.24)* | 0.92 (0.38-2.35) | 1.26 (0.98-1.60) | - |
| Sex (male) | - | - | 1.33 (1.05-1.69)* | - |
| 5-mFI (+1 pt) | 1.20 (0.97-1.47) | - | 1.06 (0.91 (1.22) | - |
| ASA Score (Low) | 0.96 (0.64-1.40) | 0.53 (0.12-1.64) | 0.81 (0.62 (1.04) | - |
| Tobacco Use (Yes) | - | -- | 0.68 (0.48-0.95)* | - |
| Pre-operative UTI | - | - | - | - |
| Bleeding Disorder | 2.52 (1.26-4.65)* | 2.84 (0.45-10.08) | - | - |
| Immunosuppressive Therapy | - | - | - | - |
| Drains | 1.86 (1.33-2.62)* | 0.49 (0.11-1.61) | 2.89 (2.25-3.75)* | 1.92 (1.37-2.72)* |
| Prior Pelvic Radiation (Yes) | - | - | - | - |
| Prior Pelvic Surgery (Yes) | - | - | - | - |
| Age (+5 yr) | 1.06 (0.99-1.14) | 1.12 (0.97-1.45) | - | - |
| BMI (+1 kg/m2) | - | 1.08 (1.03-1.13)* | 1.04 (1.02-1.06)* | - |
| Year of Surgery (+1 year) | - | - | - | 0.89 (0.79-0.99)* |
| eGFR (+10 mL/min/1.73 m²) | - | - | 1.00 (0.95-1.05) | - |
| WBC (+1 K/μL) | - | 1.10 (0.96-1.20) | - | 1.05 (0.99-1.10) |
| HCT (+1%) | 0.85 (0.82-1.05)* | - | - | - |
| Platelets (+10 K/μL) | - | - | - | - |
| PTT (+1 sec) | - | - | 0.98 (0.97-1.00) | - |
| INR (+0.1) | 1.02 (0.99-1.05) | - | - | - |
| Prolonged Operating Time | 1.01 (1.00-1.01)* | - | - | 1.01 (1.00-1.01)* |

Ref: reference; 5-mFI: Modified 5 Item Frailty Index, ASA: American Society of Anesthesiologists, UTI: Urinary Tract Infection, BMI: Body Mass Index, eGFR: estimated Glomerular Filtration Rate, WBC: White Blood Cell, HCT: Hematocrit, PTT: Partial Thromboplastin Time, INR: International Normalized Ratio.

Parentheses indicate percentages for categorical variables and ± for standard deviations for continuous variables. *indicates statistical significance. - indicates relationship did not achieve statistical significance (p<0.10) in multivariate testing.

Description of covariates in multivariate modeling of additional 30-day post-operative surgical outcomes for patients undergoing nephrectomy in NSQIP (1 of 2).

Supplementary Table 10. Multivariate Analysis of Surgical Outcomes 2 of 2

|  | Urinary Fistula | Ileus | Lymph Leak | Clinically Significant Lymph Leak | Unplanned Related Reoperation |
| --- | --- | --- | --- | --- | --- |
| Type (radical) | 0.31 (0.09-0.80)* | 2.23 (1.51-3.28)* | 1.08 (0.64-1.79) | 0.90 (0.31-2.38) | - |
| cT1a tumor stage (Yes) | - | - | - | - | - |
| Sex (male) | - | 1.55 (1.00-2.43) | - | - | 1.48 (0.76-3.05) |
| 5-mFI (+1 pt) | - | 1.06 (0.82-1.35) | 1.01 (0.77-1.31) | 1.21 (0.71-2.00) | 1.13 (0.78-1.63) |
| ASA Score (Low) | - | 0.70 (0.42-1.11) | 0.94 (0.59-1.48) | 0.71 (0.25-1.85) | 0.51 (0.22-1.06) |
| Tobacco Use (Yes) | 2.16 (1.19-3.73)* | - | - | - | 2.66 (1.37-4.98)* |
| Pre-operative UTI | - | - | - | - | 24.24 (1.23-156.27)* |
| Bleeding Disorder | - | - | 1.67 (0.50-4.20) | - | - |
| Immunosuppressive Therapy | 3.20 (1.22-6.98)* | 1.77 (0.84-3.31) | 1.51 (0.57-3.30) | - | 4.61 (1.83-10.10)* |
| Drains | 3.00 (1.68-5.67)* | - | 1.95 (1.24-3.11)* | 1.37 (0.55-3.44) | 1.35 (0.75-2.47) |
| Prior Pelvic Radiation (Yes) | - | - | - | - | - |
| Prior Pelvic Surgery (Yes) | - | 1.48 (0.98-2.22) | - | 0.45 (0.13-1.21) | 1.08 (0.54-2.06) |
| Age (+5 yr) | - | 1.04 (0.94-1.14) | - | - | 1.07 (0.93-1.22) |
| BMI (+1 kg/m2) | - | - | - | - | - |
| Year of Surgery (+1 year) | - | - | 1.31 (1.13-1.53)* | - | - |
| eGFR (+10 mL/min/1.73 m²) | - | 0.90 (0.82-0.99)* | - | - | - |
| WBC (+1 K/μL) | - | 1.09 (1.0-3-1.14)* | - | - | - |
| HCT (+1%) | - | 0.97 (0.93-1.01) | 0.96 (0.92-1.00)* | 0.90 (0.84-0.97)* | - |
| Platelets (+10 K/μL) | - | - | - | - | - |
| PTT (+1 sec) | - | - | 1.05 (1.01-1.07)* | 1.05 (1.00-1.08)* | 1.03 (0.99-1.06) |
| INR (+0.1) | - | - | - | - | - |
| Prolonged Operating Time | 1.01 (1.00-1.01)* | 1.00 (1.00-1.01)* | 1.00 (1.00-1.00) | 1.00 (0.99-1.00) | 1.00 (1.00-1.01)* |

Ref: reference; 5-mFI: Modified 5 Item Frailty Index, ASA: American Society of Anesthesiologists, UTI: Urinary Tract Infection, BMI: Body Mass Index, eGFR: estimated Glomerular Filtration Rate, WBC: White Blood Cell, HCT: Hematocrit, PTT: Partial Thromboplastin Time, INR: International Normalized Ratio.

Parentheses indicate percentages for categorical variables and ± for standard deviations for continuous variables. *indicates statistical significance. - indicates relationship did not achieve statistical significance (p<0.10) in multivariate testing.

Description of covariates in multivariate modeling of additional 30-day post-operative surgical outcomes for patients undergoing nephrectomy in NSQIP (2 of 2).

Supplementary Table 11. Multivariate Analysis of Renal and Additional Clinical Outcomes

|  | Post-operative Dialysis | AKI | Delayed Discharge ≥3d | Unplanned Related Readmission | Death |
| --- | --- | --- | --- | --- | --- |
| Type (radical) | - | 2.83 (2.12-3.80)* | 2.48 (2.12-2.89)* | - | 1.61 (0.66-3.93) |
| cT1a tumor stage (Yes) | 1.52 (0.69-3.41) | 1.27 (0.97-1.65) | 1.14 (1.00-1.31)* | 1.11 (0.91-1.36) | 1.29 (0.54-3.18) |
| Sex (male) | - | 1.59 (1.22-2.10)* | 0.85 (0.75-0.97)* | 1.29 (1.04-1.61)* | - |
| 5-mFI (+1 pt) | 1.04 (0.63-1.71) | 1.25 (1.07-1.45)* | 1.08 (0.99-1.17) | 1.10 (0.96-1.25) | 1.28 (0.75-2.13) |
| ASA Score (Low) | 0.22 (0.01-1.07) | 0.79 (0.58-1.01) | 0.88 (0.77-1.00) | 0.88 (0.71-1.09) | 0.69 (0.19-1.92) |
| Tobacco Use (Yes) | - | 0.89 (0.61-1.26) | - | - | - |
| Pre-operative UTI | - | - | - | 14.07 (4.29-40.63)* | - |
| Bleeding Disorder | - | - | 1.57 (1.10-2.20)* | 1.81 (1.06-2.90)* | - |
| Immunosuppressive Therapy (Yes) | 2.77 (0.79-7.61) | - | - | - | - |
| Drains | - | 1.25 (0.94-1.65) | 2.17 (1.89-2.48)* | 1.18 (0.97-1.44) | - |
| Prior Pelvic Radiation (Yes) | - | 1.82 (0.78-3.72) | - | - | - |
| Prior Pelvic Surgery (Yes) | 1.83 (0.85-4.05) | - | - | 0.87 (0.69-1.08) | - |
| Age (+5 yr) | 1.25 (1.01-1.58) | 1.01 (0.96-1.08) | 1.03 (1.01-1.06)* | 1.04 (0.99-1.09) | 1.54 (1.22-1.97)* |
| BMI (+1 kg/m2) | 1.07 (1.01-1.12)* | - | - | - | - |
| Year of Surgery (+1 year) | - | 1.61 (1.47-1.78)* | 0.92 (0.88-0.96)* | - | 0.71 (0.53-0.94)* |
| eGFR (+10 mL/min/1.73 m²) | 0.95 (0.93-0.97)* | 0.99 (0.98-0.99)* | 0.97 (0.94-0.99)* | 1.00 (0.99-1.00) | 0.83 (0.67-1.03) |
| WBC (+1 K/μL) | - | - | - | 1.03 (0.99-1.07) | - |
| HCT (+1%) | 0.95 (0.88-1.03) | 0.96 (0.93-0.98)* | 0.97 (0.96-0.98)* | - | 0.95 (0.88-1.03) |
| Platelets (+10 K/μL) | - | 0.99 (0.97-1.01) | 0.99 (0.99-1.00) | - | - |
| PTT (+1 sec) | - | - | - | - | - |
| INR (+0.1) | - | - | 1.02 (1.01-1.04)* | - | - |
| Prolonged Operating Time | 1.00 (0.99-1.01) | - | 1.01 (1.00-1.01)* | 1.00 (1.00-1.00)* | - |

Ref: reference; 5-mFI: Modified 5 Item Frailty Index, ASA: American Society of Anesthesiologists, UTI: Urinary Tract Infection, BMI: Body Mass Index, eGFR: estimated Glomerular Filtration Rate, WBC: White Blood Cell, HCT: Hematocrit, PTT: Partial Thromboplastin Time, INR: International Normalized Ratio.

Parentheses indicate percentages for categorical variables and ± for standard deviations for continuous variables. *indicates statistical significance. - indicates relationship did not achieve statistical significance (p<0.10) in multivariate testing.

Description of covariates in multivariate modeling of additional 30-day post-operative renal and additional clinical outcomes for patients undergoing nephrectomy in NSQIP.

Supplementary Table 12. Multivariate Analysis of Cardiac and Neurologic Clinical Outcomes

|  | CVA with Neurologic Deficit | Cardiac Arrest | Myocardial Infarction | Major Adverse Cardiac Events |
| --- | --- | --- | --- | --- |
| Type (radical) | - | - | 1.46 (0.76-2.74) | 1.71 (1.08-2.69)* |
| cT1a tumor stage (Yes) | - | 1.79 (0.67-5.02) | - | - |
| Sex (male) | - | - | - | - |
| 5-mFI (+1 pt) | - | 1.09 (0.58-1.97) | 1.18 (0.78-1.77) | 1.27 (0.95-1.68) |
| ASA Score (Low) | - | - | 0.88 (0.40-1.80) | 0.98 (0.55-1.67) |
| Tobacco Use (Yes) | - | - | - | - |
| Pre-operative UTI | - | - | - | - |
| Bleeding Disorder | 9.19 (2.13-27.83)* | 4.13 (0.63-15.34) | - | 3.45 (1.49-6.97)* |
| Immunosuppressive Therapy | - | - | - | - |
| Drains | - | - | - | - |
| Prior Pelvic Radiation (Yes) | - | - | - | - |
| Prior Pelvic Surgery (Yes) | 2.27 (0.91-5.73) | - | - | - |
| Age (+5 yr) | - | 1.36 (1.05-1.82)* | 1.37 (1.15-1.63)* | 1.26 (1.12-1.43)* |
| BMI (+1 kg/m2) | - | - | - | - |
| Year of Surgery (+1 year) | - | - | - | - |
| eGFR (+10 mL/min/1.73 m²) | - | 0.77 (0.60-0.99)* | 0.95 (0.80-1.12) | 0.91 (0.80-1.02) |
| WBC (+1 K/μL) | - | - | - | 1.06 (0.99-1.12) |
| HCT (+1%) | - | 0.90 (0.82-0.99)* | - | 0.97 (0.93-1.02) |
| Platelets (+10 K/μL) | - | - | - | - |
| PTT (+1 sec) | - | - | - | - |
| INR (+0.1) | - | - | - | - |
| Prolonged Operating Time | - | 1.01 (1.00-1.01)* | - | - |

Ref: reference; 5-mFI: Modified 5 Item Frailty Index, ASA: American Society of Anesthesiologists, UTI: Urinary Tract Infection, BMI: Body Mass Index, eGFR: estimated Glomerular Filtration Rate, WBC: White Blood Cell, HCT: Hematocrit, PTT: Partial Thromboplastin Time, INR: International Normalized Ratio.

Parentheses indicate percentages for categorical variables and ± for standard deviations for continuous variables. *indicates statistical significance. - indicates relationship did not achieve statistical significance (p<0.10) in multivariate testing.

Description of covariates in multivariate modeling of additional 30-day post-operative cardiac and neurologic outcomes for patients undergoing nephrectomy in NSQIP.

Supplementary Table 13. Reasons for Unplanned Related Reoperation after Nephrectomy by Surgical Approach

| Reasons for Re-Operation | Partial Nephrectomy  n=9,418 (72.3%) | Radical Nephrectomy  n=3,606 (27.7%) | p-value |
| --- | --- | --- | --- |
| Nephrectomy | 6 (0.1%) | 0 (0.0%) | 0.29 |
| Urinary Tract Injury | 49 (0.5%) | 1 (0.0%) | <0.01* |
| Exploratory Laparotomy or Laparoscopy | 10 (0.1%) | 11 (0.3%) | 0.02* |
| GI Tract Injury | 4 (0.0%) | 3 (0.1%) | 0.63 |
| Hernia Repair or Wound Dehiscence | 10 (0.1%) | 17 (0.5%) | <0.01* |

GI: Gastrointestinal

Parentheses indicate percentages for categorical variables and ± for standard deviations for continuous variables. *indicates statistical significance.

Reporting of rates of various reasons for unplanned related reoperation after nephrectomy for patients undergoing minimally-invasive partial or radical nephrectomy in NSQIP.

Supplementary Table 14. Additional Preoperative Patient Characteristics for MIPN and MIRN

| **Pre-Operative Characteristics** | **Overall**  **n=13,024** | **Partial Nephrectomy**  **n=9,418**  **(72.3%)** | **Radical Nephrectomy**  **n=3,606**  **(27.7%)** | **p-value** |
| --- | --- | --- | --- | --- |
| Demographics | | | | |
| Sex (Male) | 8281 (63.6%) | 6019 (63.9%) | 2262 (62.7%) | 0.22 |
| Race |  |  |  | <0.01* |
| American Indian or Alaska Native | 99 (0.8%) | 58 (0.6%) | 41 (1.1%) |  |
| Multiple/Other | 152 (1.2%) | 130 (1.4%) | 22 (0.6%) |  |
| Native Hawaiian or Pacific Islander | 16 (0.1%) | 8 (0.1%) | 8 (0.2%) |  |
| Unknown | 2003 (15.4%) | 1396 (14.8%) | 607 (16.8%) |  |
| Past Medical History | | | | |
| 5-mFI |  |  |  | <0.01* |
| 0 | 4377 (33.6%) | 3264 (34.7%) | 1113 (30.9%) |  |
| 1 | 5688 (43.7%) | 4089 (43.4%) | 1599 (44.3%) |  |
| 2 | 2698 (20.7%) | 1898 (20.2%) | 800 (22.2%) |  |
| 3 | 237 (1.8%) | 156 (1.7%) | 81 (22.2%) |  |
| 4 | 22 (0.2%) | 11 (0.1%) | 11 (0.3%) |  |
| 5 | 2 (0%) | 0 (0%) | 2 (0.1%) |  |
| ASA Physical Status Classification |  |  |  | <0.01* |
| 1-No Disturbance | 137 (1.1%) | 108 (1.1%) | 29 (0.8%) |  |
| 2-Mild Disturbance | 4681 (35.9%) | 3588 (38.1%) | 1093 (30.3%) |  |
| 3-Severe Disturbance | 7845 (60.2%) | 5516 (58.6%) | 2329 (64.6%) |  |
| 4-Life Threatening | 353 (2.7%) | 200 (2.1%) | 153 (4.2%) |  |
| Diabetes Mellitus (Insulin-Dependent) | 793 (6.1%) | 546 (5.8%) | 247 (6.8%) | 0.05 |
| UTI | 15 (0.1%) | 13 (0.1%) | 2 (0.1%) | 0.34 |
| Active Smoker | 2101 (16.1%) | 1519 (16.1%) | 582 (16.1%) | 1.00 |
| Preoperative WBC (K/μL) | 7.3 ± 2.3 | 7.3 ± 2.4 | 7.4 ± 2.3 | 0.05 |
| Preoperative Platelets (K/uL) | 251.1 ± 73.6 | 250.1 ± 70.3 | 253.7 ± 81.7 | 0.02 |
| Year of Operation (since 2019) | 2.1 ± 1.4 | 2.2 ± 1.4 | 2 ± 1.4 | <0.01* |
| Clinical Tumor Stage |  |  |  | <0.01* |
| T1a | 8496 (65.2%) | 7353 (78.1%) | 1143 (31.7%) |  |
| T1b | 3584 (27.5%) | 1880 (20%) | 1704 (47.3%) |  |
| T2a | 716 (5.5%) | 153 (1.6%) | 563 (15.6%) |  |
| T2b | 228 (1.8%) | 32 (0.3%) | 196 (5.4%) |  |
| Preoperative Mechanical Bowel Prep | 1840 (16.3%) | 1308 (16%) | 532 (17.2%) | 0.15 |
| Preoperative Oral Antibiotic | 186 (1.7%) | 137 (1.7%) | 49 (1.6%) | 0.76 |
| Perioperative Antibiotic (<72 hours) | 12784 (98.2%) | 9269 (98.4%) | 3515 (97.5%) | <0.01* |
| Postoperative VTE Prophylaxis | 8286 (63.6%) | 5818 (61.8%) | 2468 (68.4%) | <0.01* |

Ref: reference; 5-mFI: Modified 5 Item Frailty Index, ASA: American Society of Anesthesiologists, UTI: Urinary Tract Infection, WBC: White Blood Cells, VTE: Venous Thromboembolism. Parentheses indicate percentages for categorical variables and ± for standard deviations for continuous variables. *indicates statistical significance.

Reporting of additional baseline rates of various pre-operative patient characteristics for patients undergoing minimally-invasive partial or radical nephrectomy in NSQIP.
